# Supplementary material
Source: PubMed Central journal article supplement (PMC7192762)

○ Control  
● Exercise

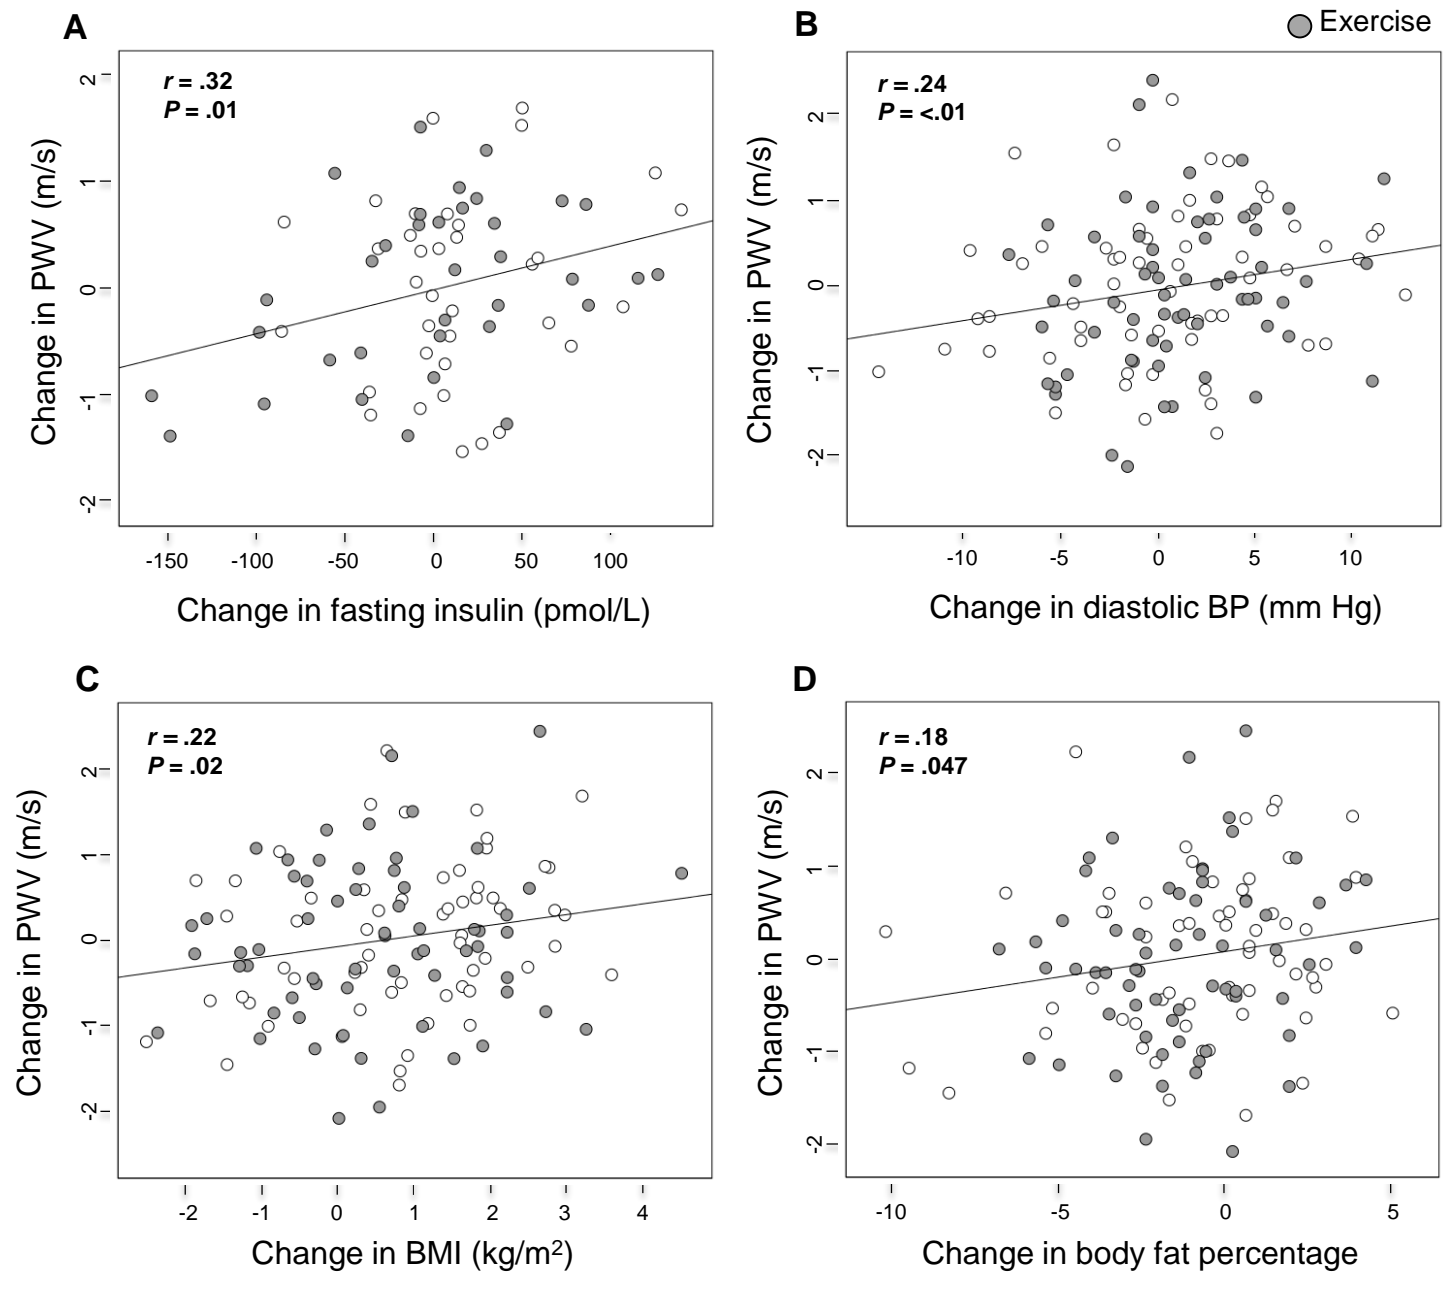

Supplement: NIHMS1541853-supplement-Sup_Fig2.pdf [file NIHMS1541853-supplement-Sup_Fig2.pdf]
